# Supplementary material for: The dual behaviour of β-vinylporphyrins in the presence of α,α′-dioxothiones
Source: Royal Society of Chemistry journal article supplement (doi:10.1039/d3nj02859c), 2023-01-01
Supplement: d3nj02859c1.pdf [file d3nj02859c1.pdf]

## The dual behaviour of $\beta$ -vinylporphyrins in the presence of $\alpha,\alpha'$ - dioxothiones

Cristina J. Dias,<sup>a,b</sup> Francesco Papi,<sup>c</sup> Maxime Denis,<sup>c,d</sup> Cristina Nativi,<sup>c</sup> M. Graça P. M. S. Neves,<sup>a</sup> M. Amparo F. Faustino,<sup>a</sup>

<sup>a</sup> LAQV-Requimte and Department of Chemistry, University of Aveiro, 3010-193 Aveiro, Portugal.

<sup>b</sup> iBiMED - Institute of Biomedicine, Department of Medical Sciences, University of Aveiro, 3810-193 Aveiro, Portugal.

<sup>c</sup> Department of Chemistry, University of Florence, via della Lastruccia, 3-13, I-50119 Sesto F.no (FI), Italy

<sup>d</sup> Giotto Biotech, via L. Sacconi,6 - Sesto Fiorentino (FI), Italy

### List of Figures

|                                                                                                                                                                                                                                                                                                                                                                                  |   |
|----------------------------------------------------------------------------------------------------------------------------------------------------------------------------------------------------------------------------------------------------------------------------------------------------------------------------------------------------------------------------------|---|
| <b>NMR Data</b> .....                                                                                                                                                                                                                                                                                                                                                            | 1 |
| <b>Figure S1.</b> <sup>1</sup> H NMR (above) and <sup>13</sup> C NMR (below) spectra of the reactional mixture of <b>chlorins 3a</b> and <b>3b</b> in tautomeric equilibrium with <b>porphyrin 4</b> , in CDCl <sub>3</sub> .....                                                                                                                                                | 2 |
| <b>Figure S2.</b> <sup>1</sup> H/ <sup>1</sup> H COSY of <b>chlorins 3a</b> and <b>3b</b> in tautomeric equilibrium with <b>porphyrin 4</b> , in CDCl <sub>3</sub> .....                                                                                                                                                                                                         | 3 |
| <b>Figure S3.</b> <sup>1</sup> H NMR spectrum of <b>chlorin 3a/porphyrin 4</b> in tautomeric equilibrium, in CDCl <sub>3</sub> ..                                                                                                                                                                                                                                                | 3 |
| <b>Figure S4.</b> <sup>13</sup> C NMR spectrum of <b>chlorin 3a/porphyrin 4</b> in tautomeric equilibrium, in CDCl <sub>3</sub> ..                                                                                                                                                                                                                                               | 4 |
| <b>Figure S5.</b> <sup>1</sup> H NMR spectrum of <b>chlorin 3b/porphyrin 4</b> in tautomeric equilibrium, in CDCl <sub>3</sub> ..                                                                                                                                                                                                                                                | 4 |
| <b>Figure S6.</b> <sup>13</sup> C NMR spectrum of <b>chlorin 3b/porphyrin 4</b> in tautomeric equilibrium, in CDCl <sub>3</sub> ..                                                                                                                                                                                                                                               | 5 |
| <b>Mass Spectrometry Data</b> .....                                                                                                                                                                                                                                                                                                                                              | 5 |
| <b>Figure S7.</b> HRMS of <b>chlorin 3a/porphyrin 4</b> in tautomeric equilibrium. ....                                                                                                                                                                                                                                                                                          | 5 |
| <b>Figure S8.</b> HRMS of <b>chlorin 3b/porphyrin 4</b> in tautomeric equilibrium. ....                                                                                                                                                                                                                                                                                          | 6 |
| <b>Synthesis</b> .....                                                                                                                                                                                                                                                                                                                                                           | 7 |
| <b>Scheme S1.</b> Representation of the different attempts of cycloaddition reaction between <b>TPP</b> or <b>PPF5</b> and the $\alpha,\alpha'$ - <b>dioxothione</b> .....                                                                                                                                                                                                       | 7 |
| <b>Photophysical Characterization Data</b> .....                                                                                                                                                                                                                                                                                                                                 | 7 |
| <b>Figure S10.</b> Photo-oxidation of DMA, in DMF, photosensitized by cycloadducts <b>chlorin 3a/porphyrin 4</b> and <b>chlorin 3b/porphyrin 4</b> (left) and <b>porphyrin 5</b> (right), and the reference <b>TPP</b> during 600 s at 420 nm $\pm$ 5 nm. The symbols may be overlapped, and the error bars corresponds to the standard deviation of two independent assays..... | 7 |

## NMR Data

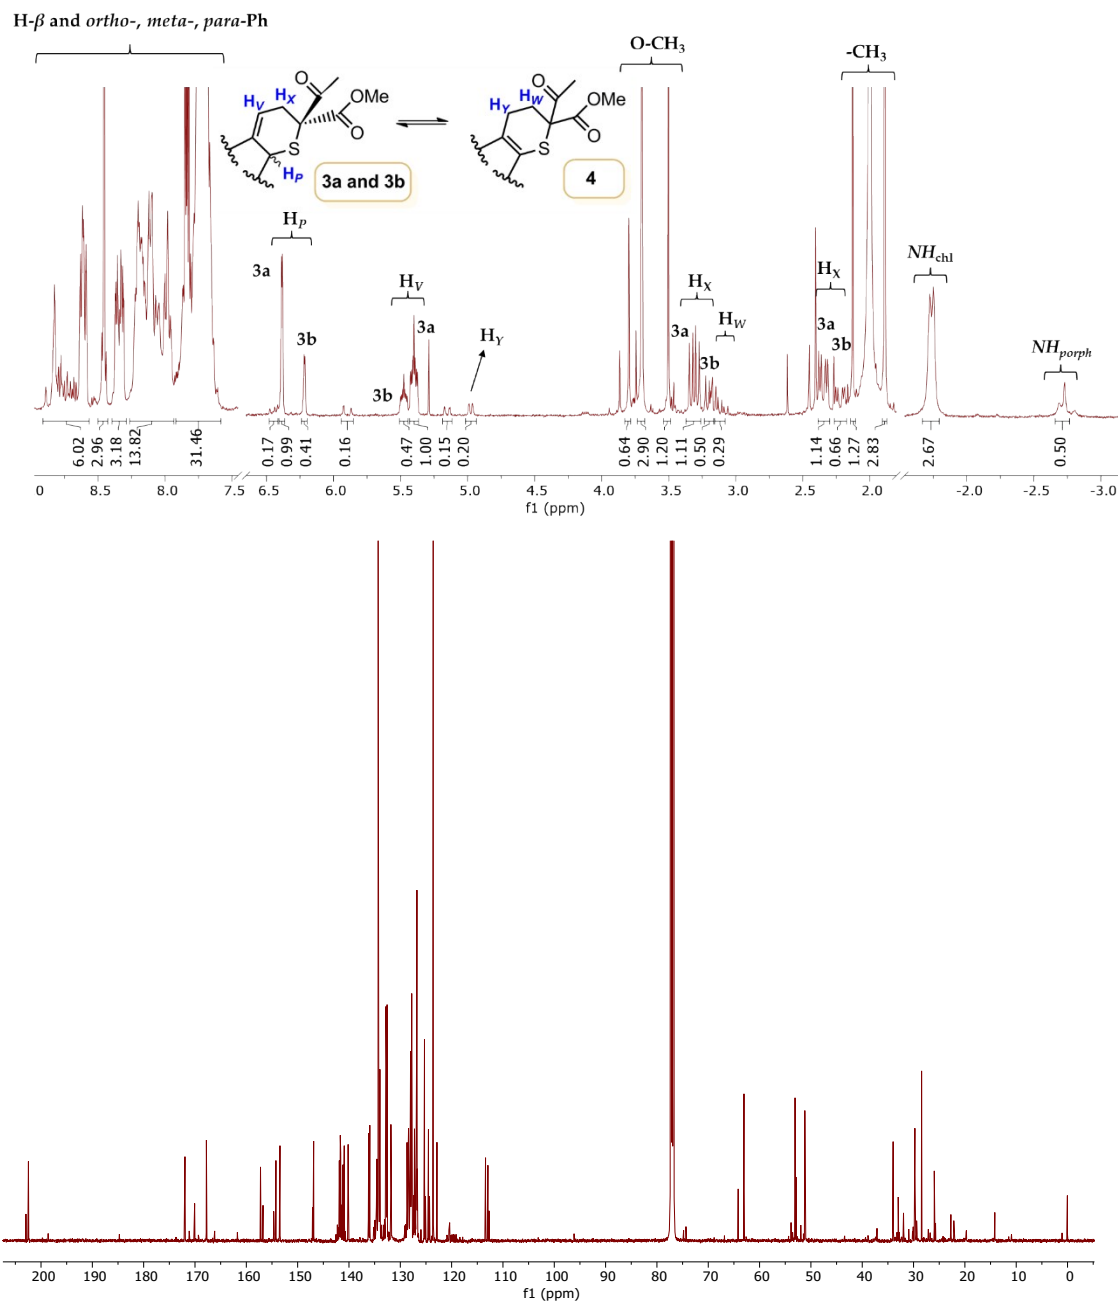

**Figure S1.**  $^1\text{H}$  NMR (above) and  $^{13}\text{C}$  NMR (below) spectra of the reactional mixture of chlorins **3a** and **3b** in tautomeric equilibrium with porphyrin **4**, in  $\text{CDCl}_3$ .

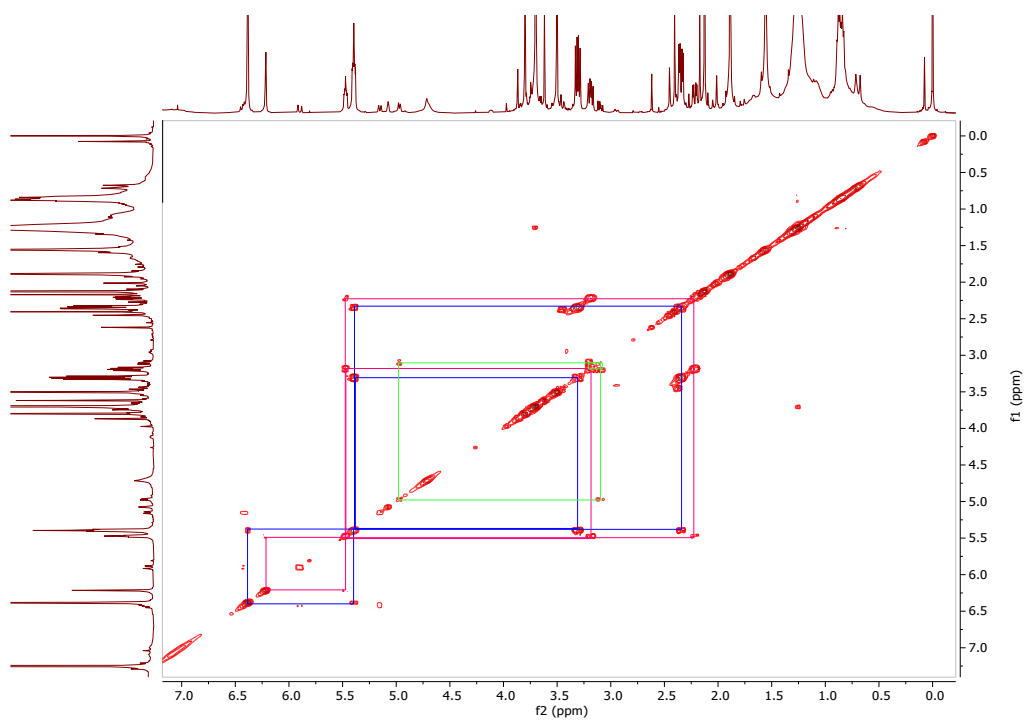

Figure S2.  $^1\text{H}/^1\text{H}$  COSY of chlorins **3a** and **3b** in tautomeric equilibrium with porphyrin **4**, in  $\text{CDCl}_3$ .

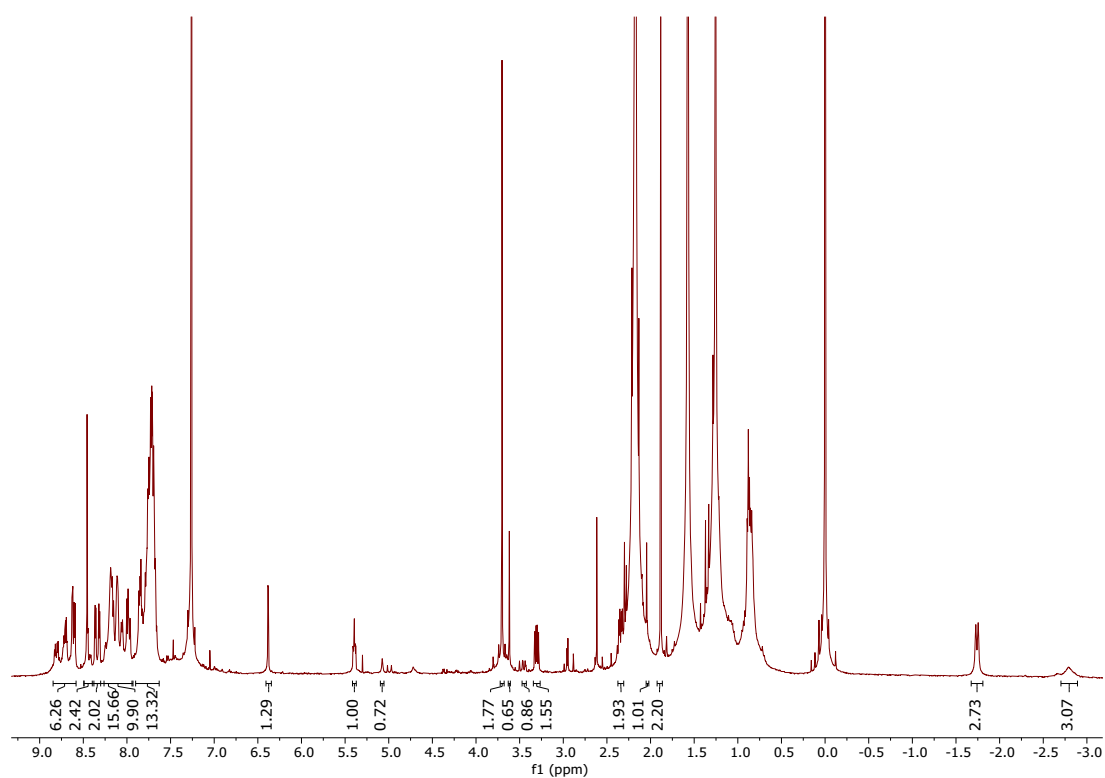

Figure S3.  $^1\text{H}$  NMR spectrum of chlorin **3a**/porphyrin **4** in tautomeric equilibrium, in  $\text{CDCl}_3$ .

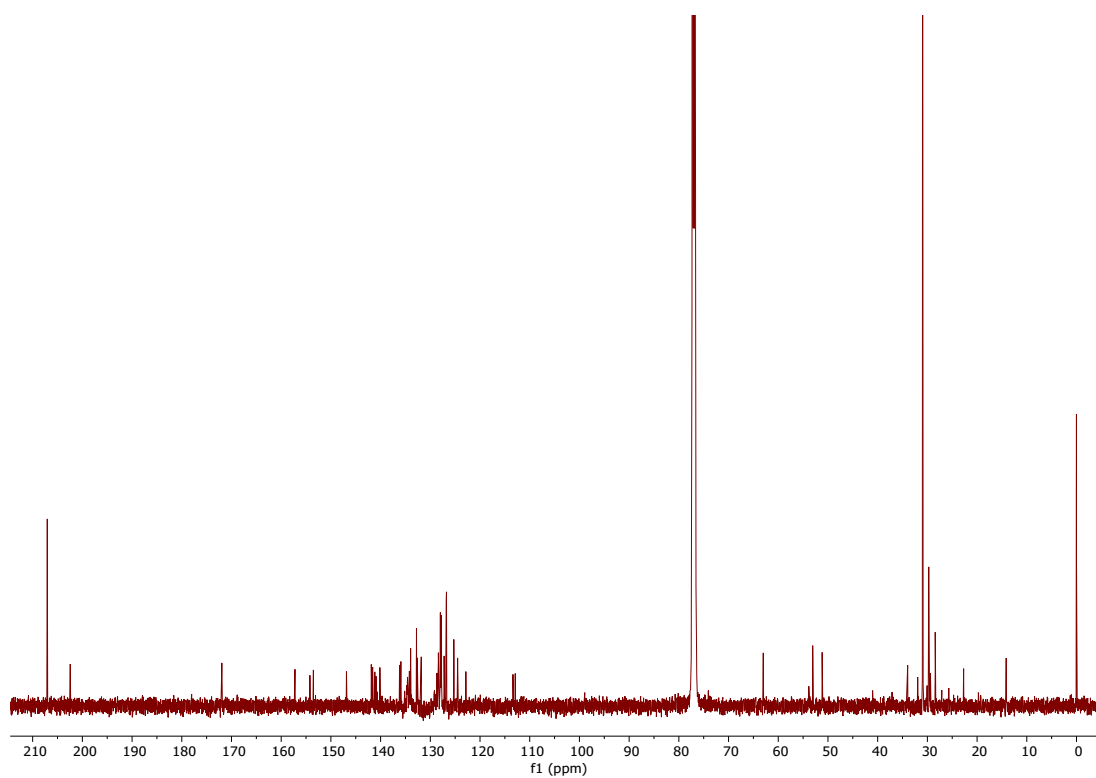

Figure S4.  $^{13}\text{C}$  NMR spectrum of chlorin 3a/porphyrin 4 in tautomeric equilibrium, in  $\text{CDCl}_3$ .

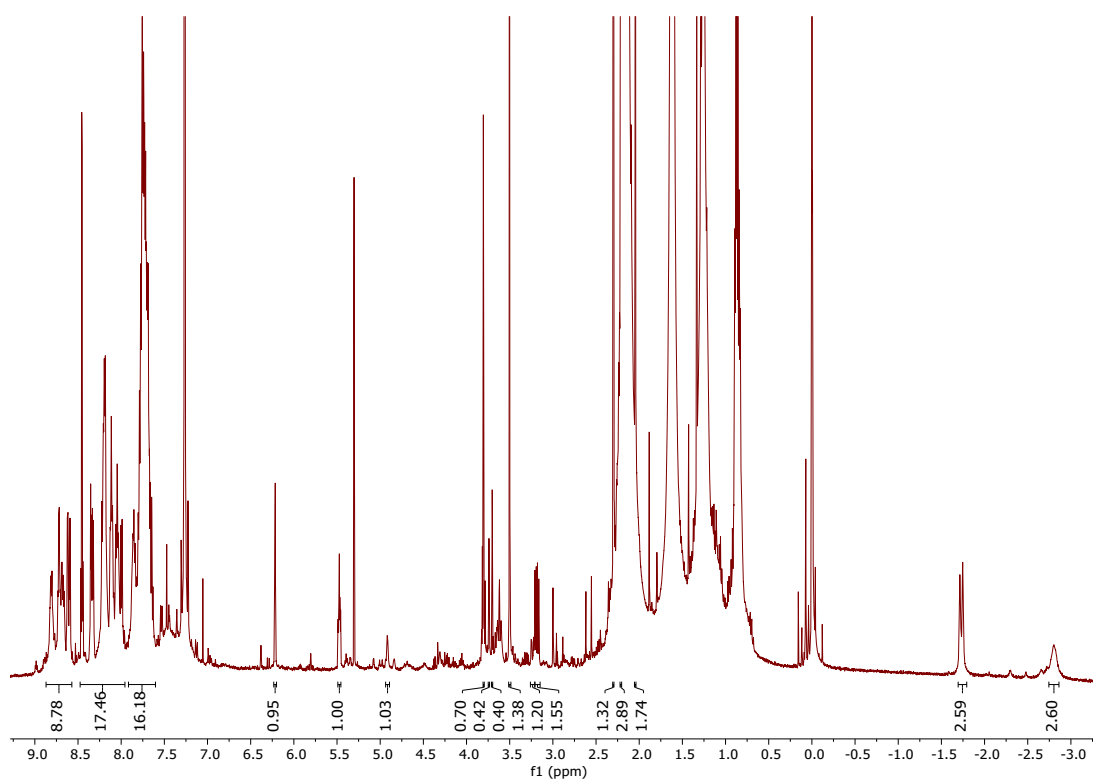

Figure S5.  $^1\text{H}$  NMR spectrum of chlorin 3b/porphyrin 4 in tautomeric equilibrium, in  $\text{CDCl}_3$ .

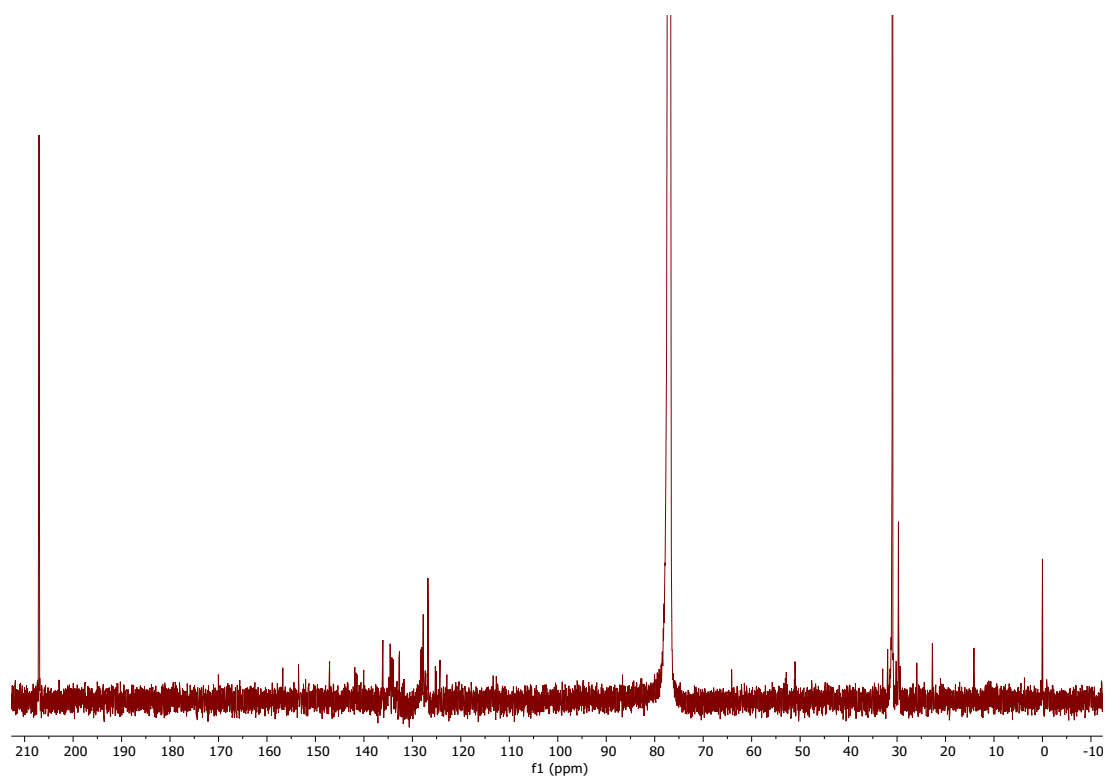

Figure S6.  $^{13}\text{C}$  NMR spectrum of chlorin 3b/porphyrin 4 in tautomeric equilibrium, in  $\text{CDCl}_3$ .

### Mass Spectrometry Data

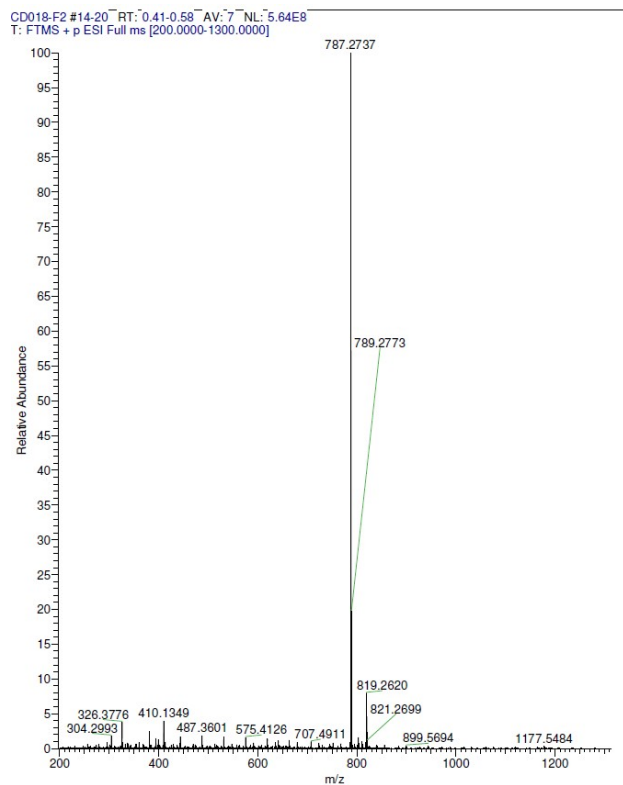

Figure S7. HRMS of chlorin 3a/porphyrin 4 in tautomeric equilibrium.

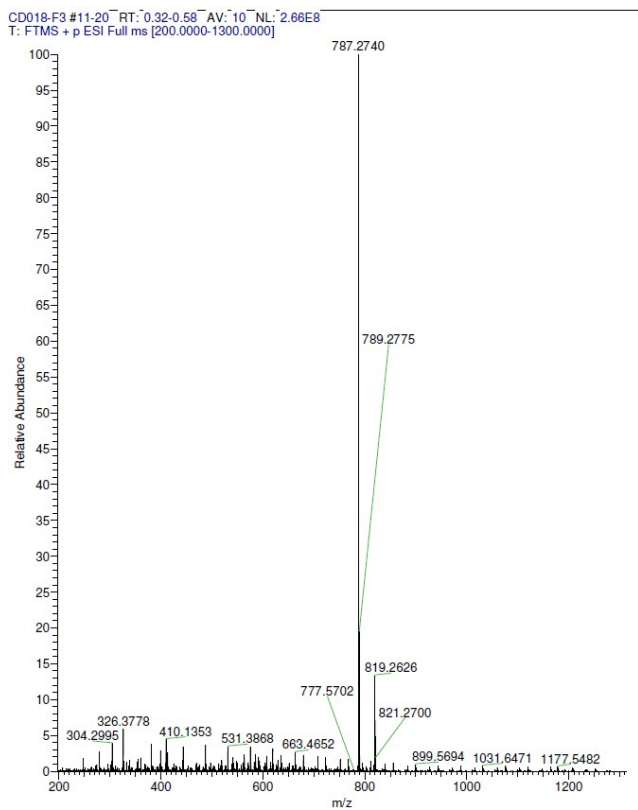

Figure S8. HRMS of chlorin 3b/porphyrin 4 in tautomeric equilibrium.

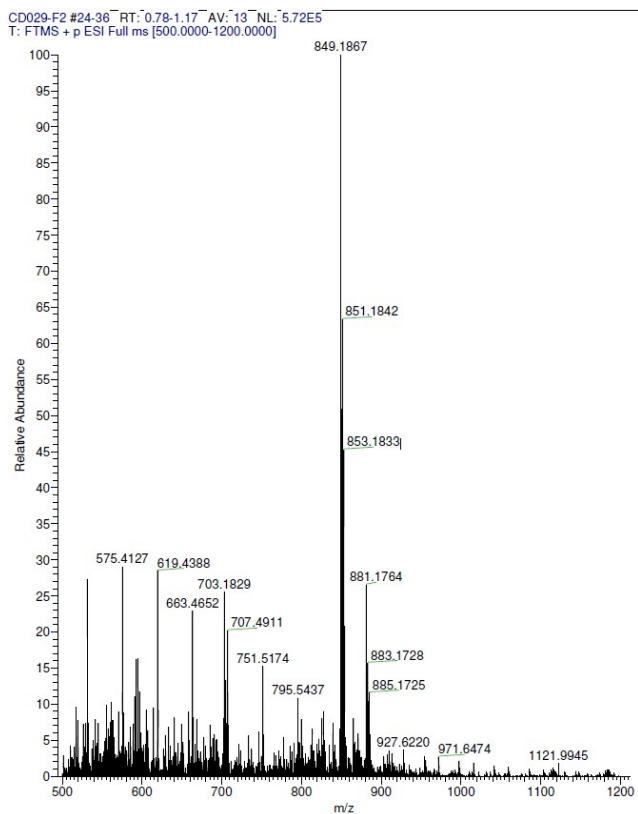

Figure S9. HRMS of porphyrin 5.

## Synthesis

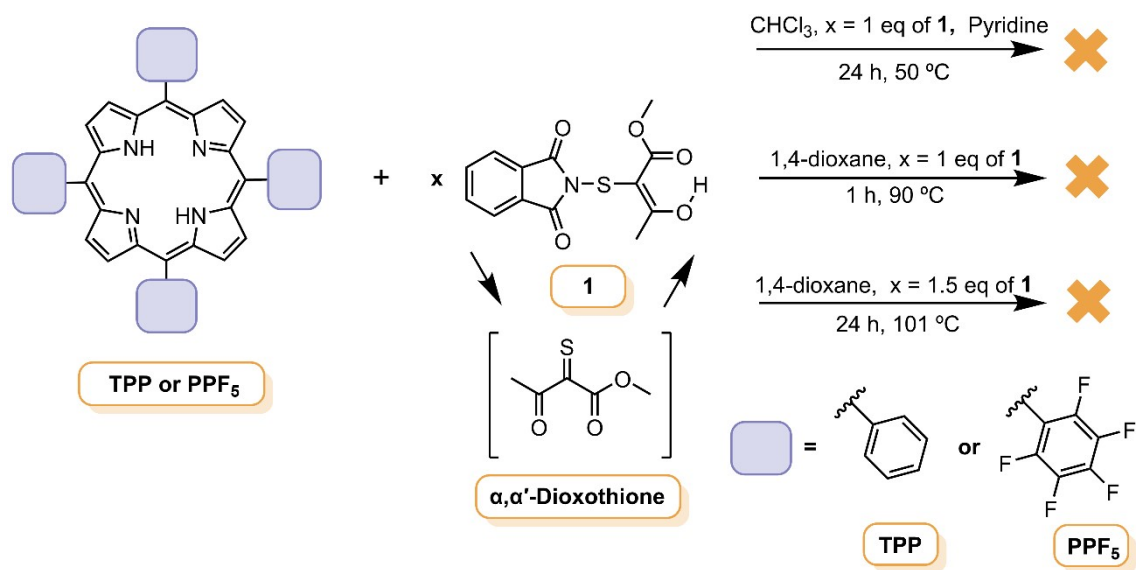

**Scheme S1.** Representation of the different attempts of cycloaddition reaction between **TPP** or **PPF<sub>5</sub>** and the  $\alpha,\alpha'$ -dioxothione.

## Photophysical Characterization Data

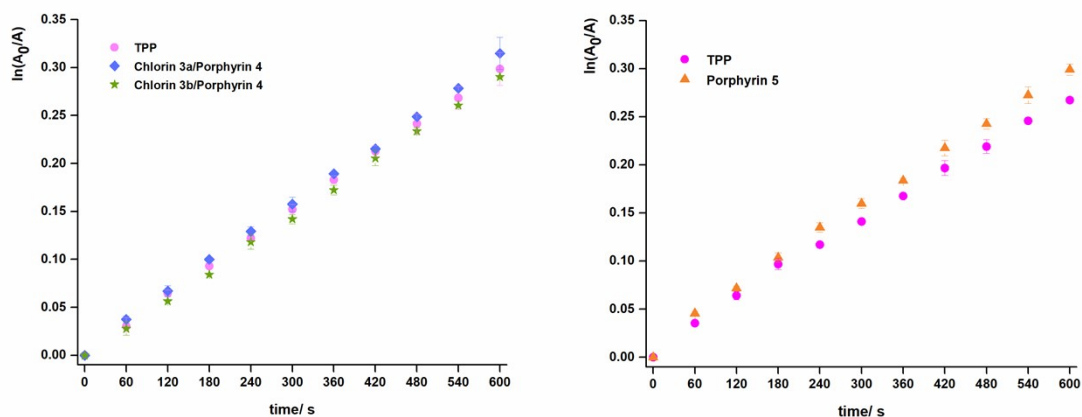

**Figure S10.** Photo-oxidation of DMA, in DMF, photosensitized by cycloadducts **chlorin 3a/porphyrin 4** and **chlorin 3b/porphyrin 4** (left) and **porphyrin 5** (right), and the reference **TPP** during 600 s at  $420 \text{ nm} \pm 5 \text{ nm}$ . The symbols may be overlapped, and the error bars corresponds to the standard deviation of two independent assays.
